# Supplementary material for: Cation substitution induced novel gehlenite Ca2GaAlSiO7:Eu2+/Ce3+phosphor with green/blue emission for UV-WLEDs
Source: Royal Society of Chemistry journal article supplement (doi:10.1039/c7ra04105e), 2017-01-01
Supplement: c7ra04105e1.pdf [file c7ra04105e1.pdf]

## **Supplementary Information**

**Title:** Cation substitution induced novel gehlenite  $\text{Ca}_2\text{GaAlSiO}_7\text{:Eu}^{2+}/\text{Ce}^{3+}$  phosphor with green/blue emission for UV-WLEDs

**Author(s):** Mengmeng Jiao,<sup>a</sup> Qinfeng Xu,<sup>a</sup> Chuanlu Yang<sup>a\*</sup> and Hongpeng You<sup>b\*</sup>

<sup>a</sup> School of Physics and Optoelectronic Engineering, Ludong University, Yantai 264025, China.

<sup>b</sup> State Key Laboratory of Rare Earth Resource Utilization, Changchun Institute of Applied Chemistry, Chinese Academy of Sciences, Changchun 130022, P. R. China.

\*Corresponding author: E-mail: ycl@ldu.edu.cn (C.Y.); hpyou@ciac.ac.cn (H.Y.)

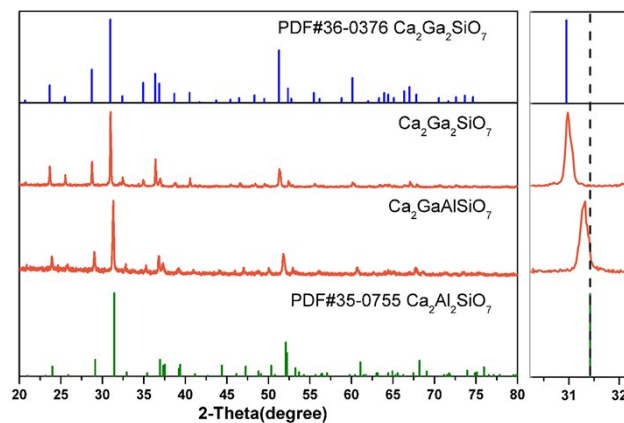

Figure S1. XRD patterns of prepared  $\text{Ca}_2\text{GaAlSiO}_7$  and  $\text{Ca}_2\text{Ga}_2\text{SiO}_7$  samples together with the standard data (PDF#35-0755, 36-0376) for reference.

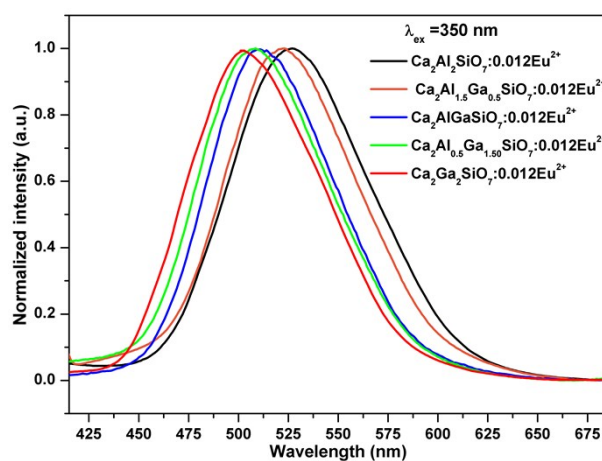

Figure S2. Emission spectra of  $\text{Ca}_2(\text{Al,Ga})_2\text{SiO}_7:0.012\text{Eu}^{2+}$  samples with different ratio of Al/Ga.

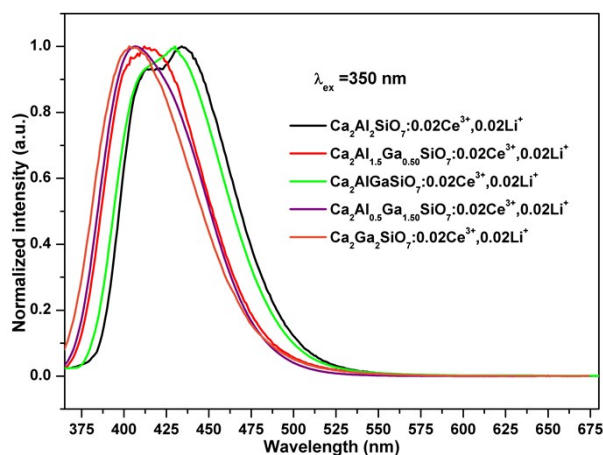

Figure S3. Emission spectra of  $\text{Ca}_2(\text{Al,Ga})_2\text{SiO}_7:0.02\text{Ce}^{3+},0.02\text{Li}^+$  samples with different Al/Ga ratio.
